# Supplementary material for: Validation and characterization of a QTL for adult plant resistance to stripe rust on wheat chromosome arm 6BS (Yr78)
Source: PubMed Central journal article supplement (PMC5606939; doi:10.1007/s00122-017-2946-9), 2017-07-19
Supplement: 122_2017_2946_MOESM1_ESM.pdf [file 122_2017_2946_MOESM1_ESM.pdf]

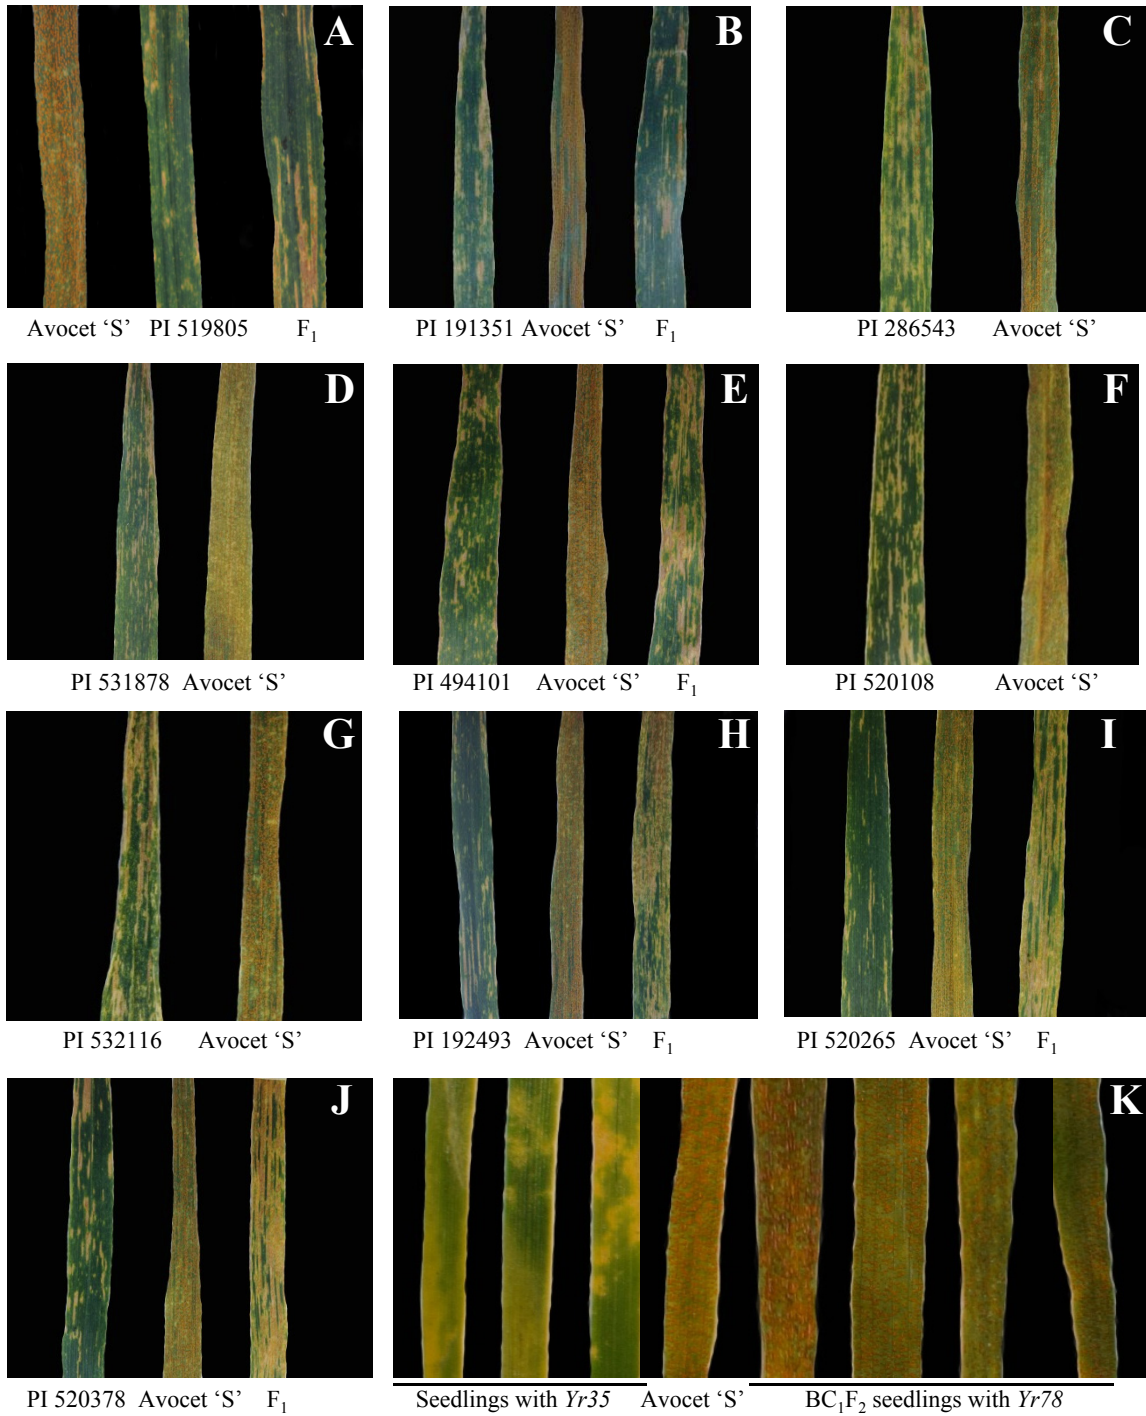

Supplementary Figure S1

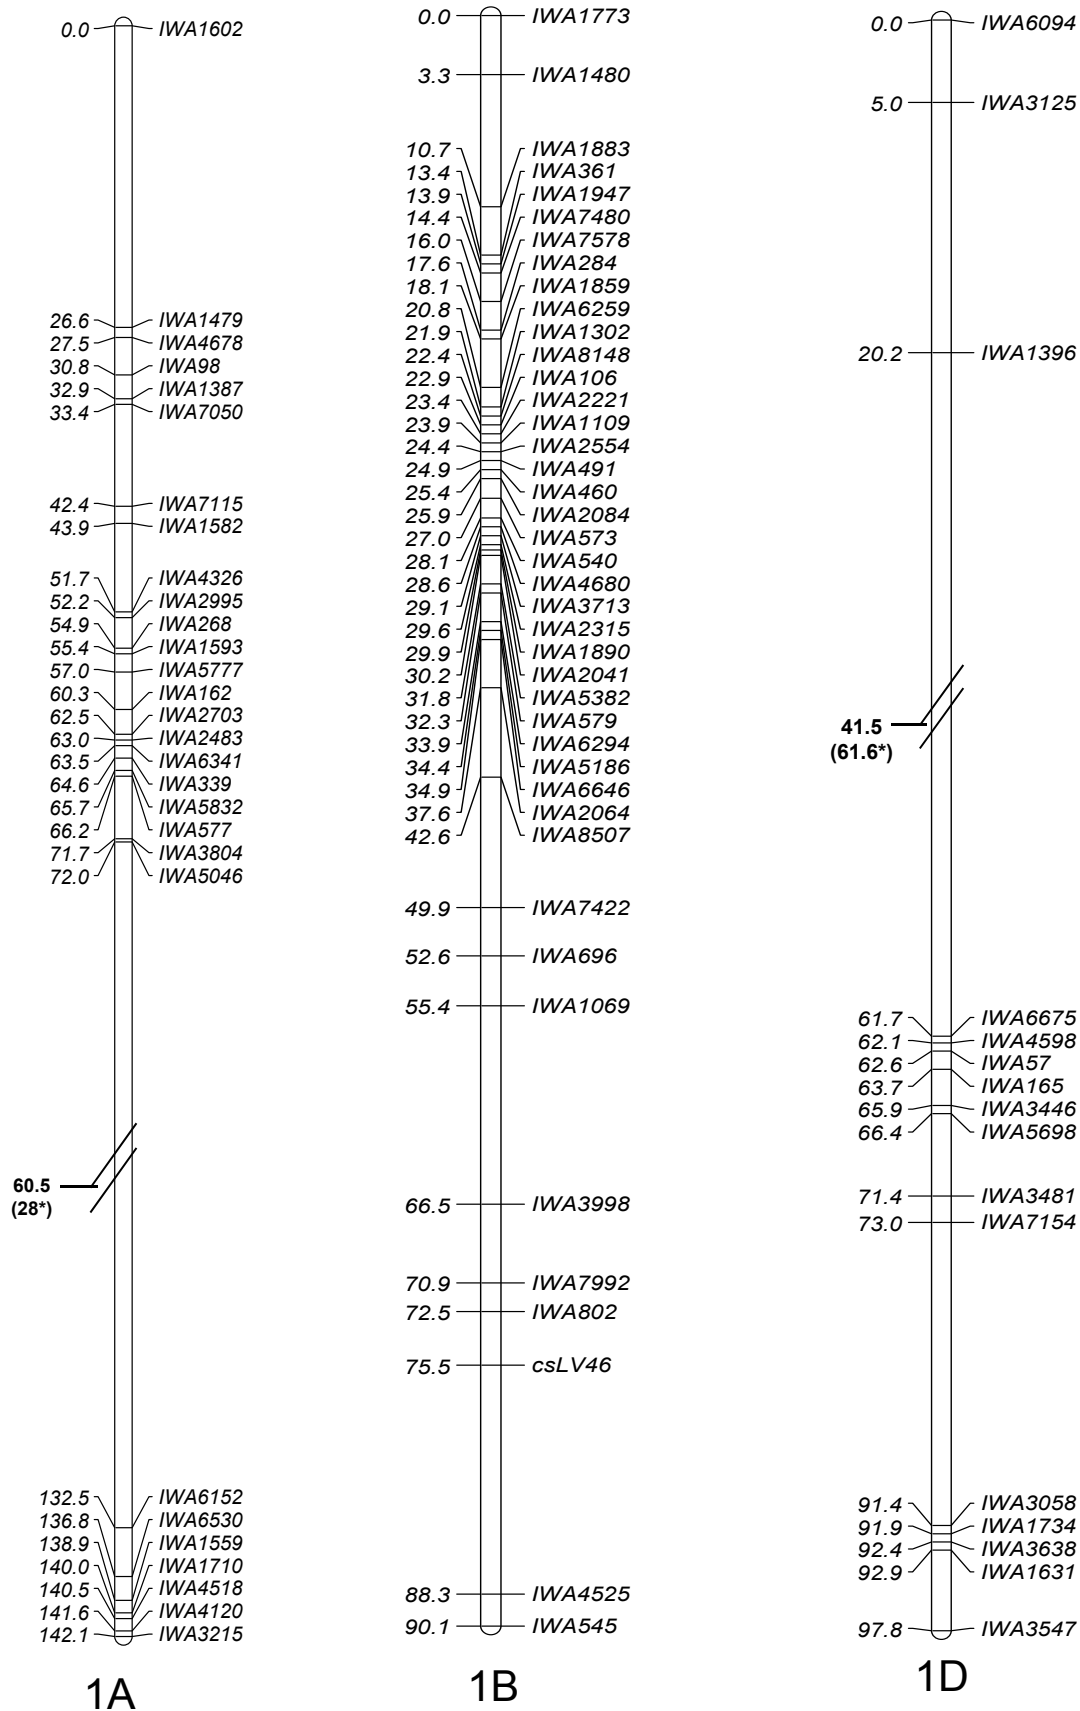

Supplementary Figure S2

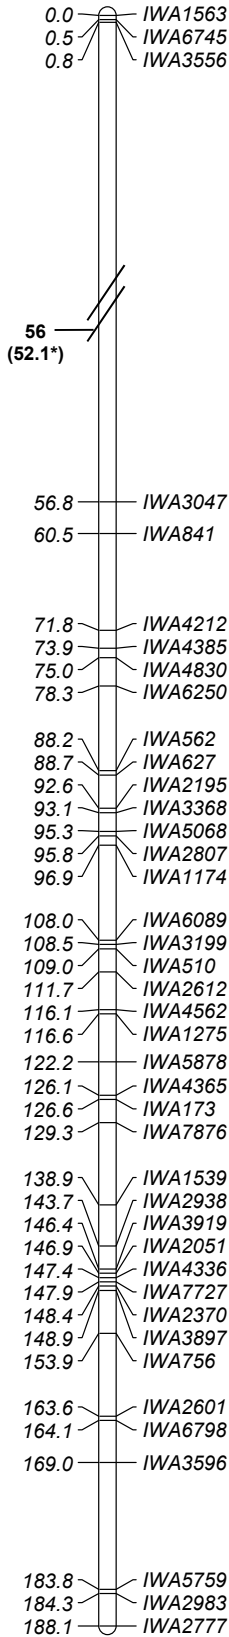

2A

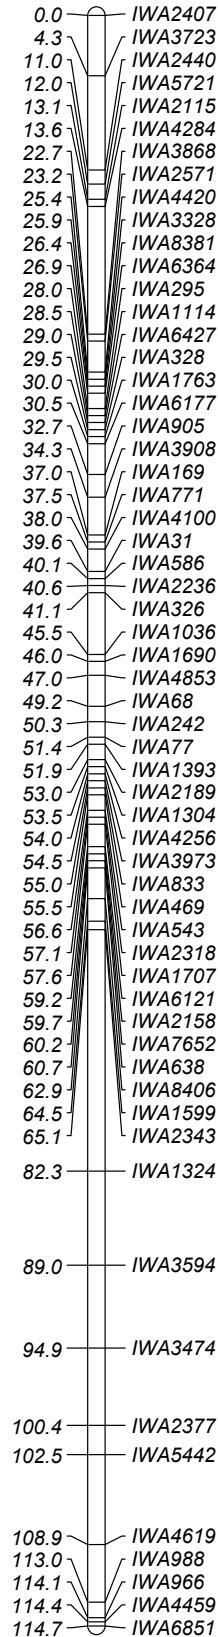

2B

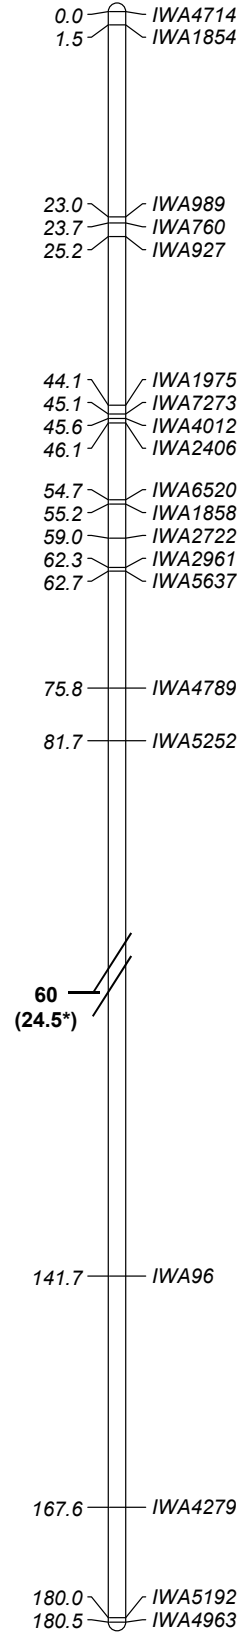

2D

Supplementary Figure S2

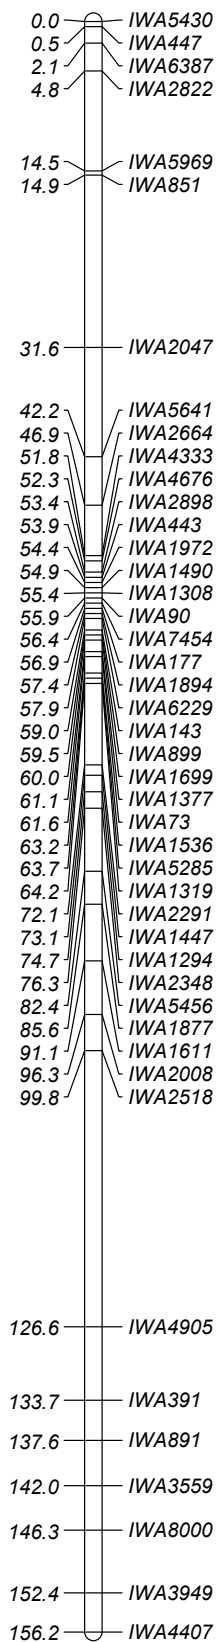

3A

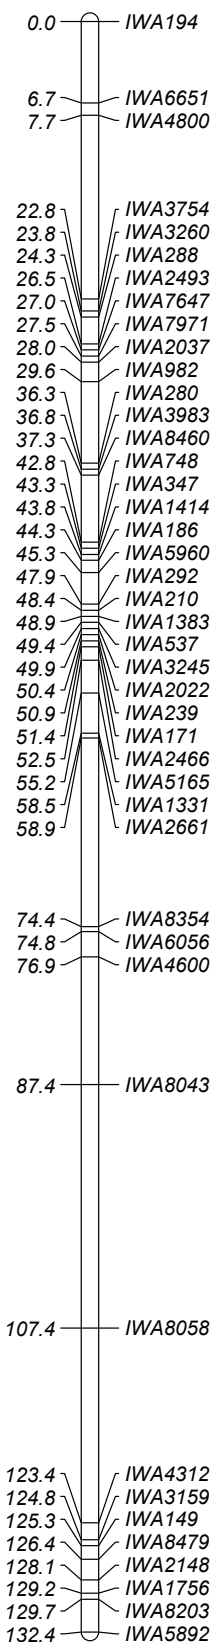

3B

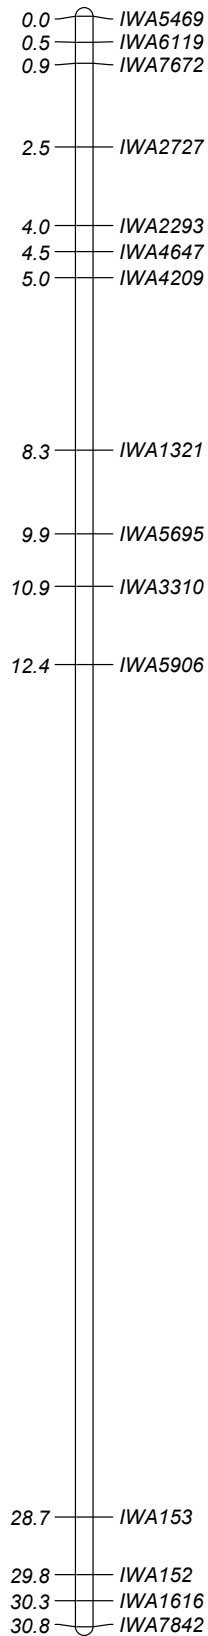

3D

Supplementary Figure S2

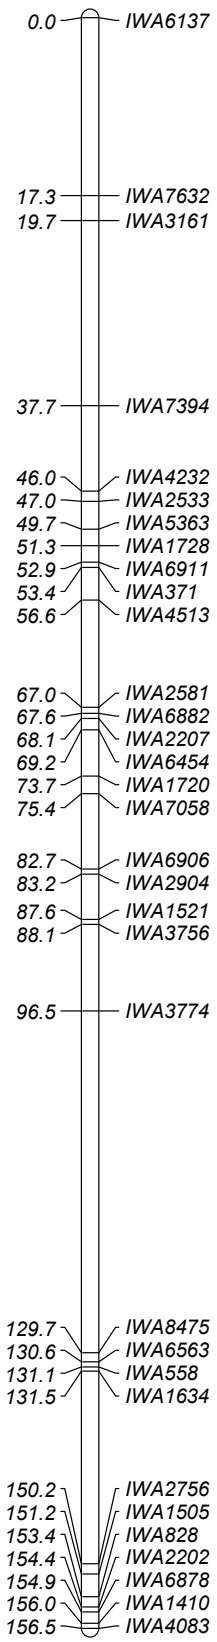

4A

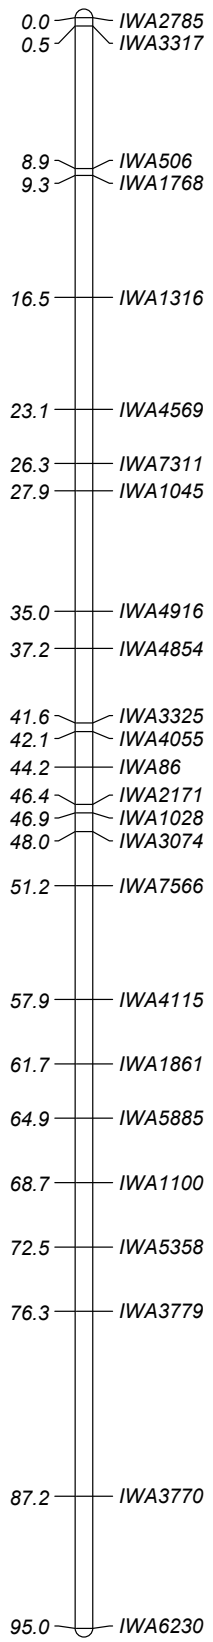

4B

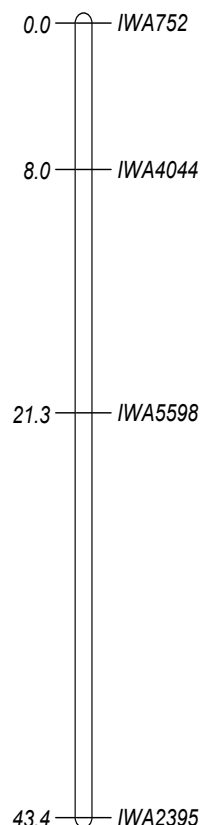

4D

Supplementary Figure S2

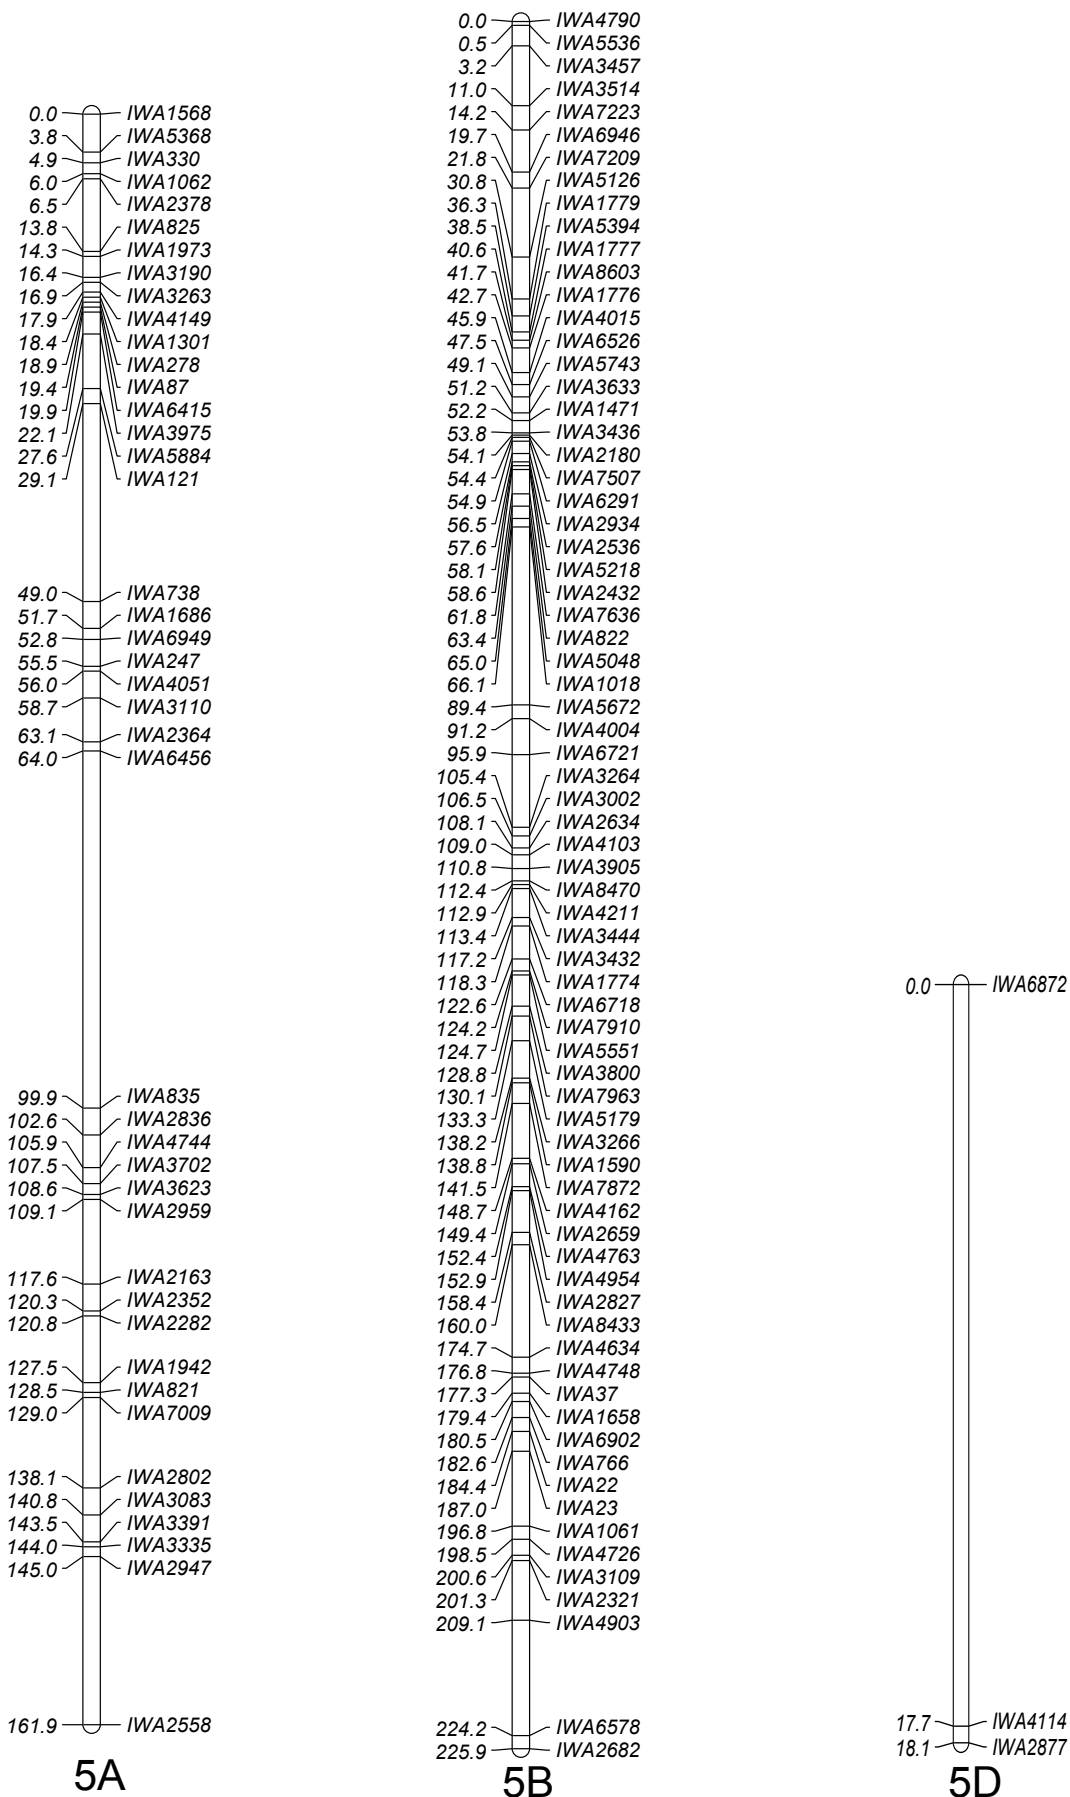

Supplementary Figure S2

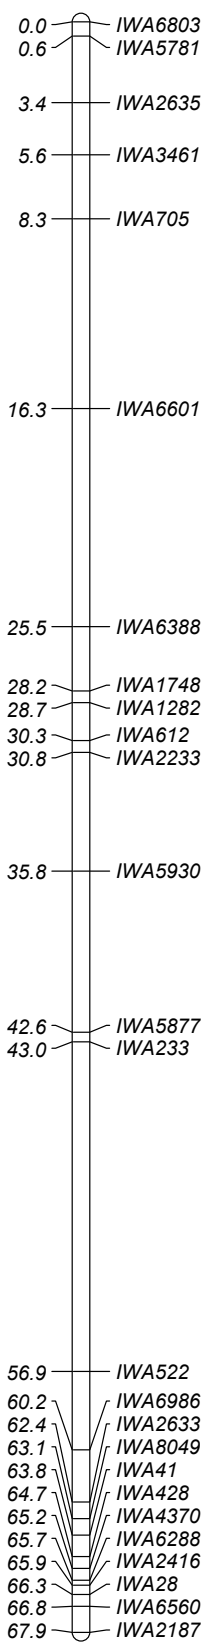

6A

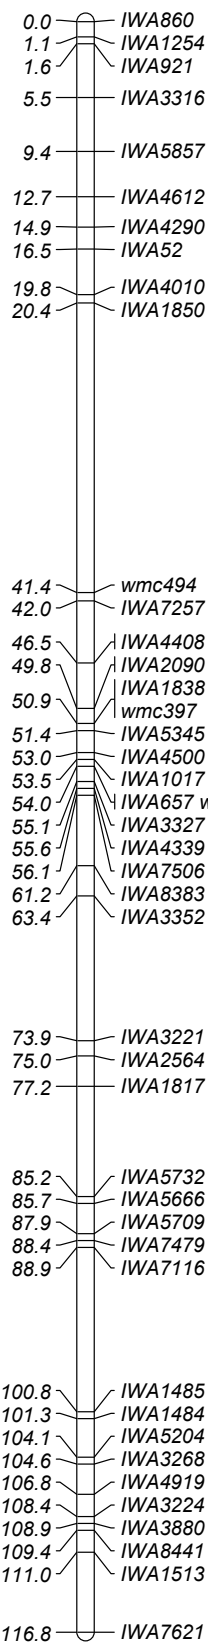

6B

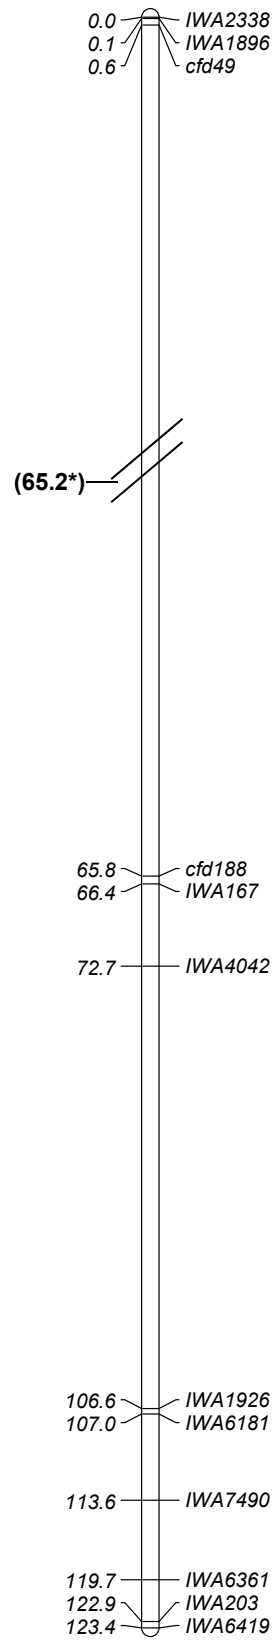

6D

Supplementary Figure S2

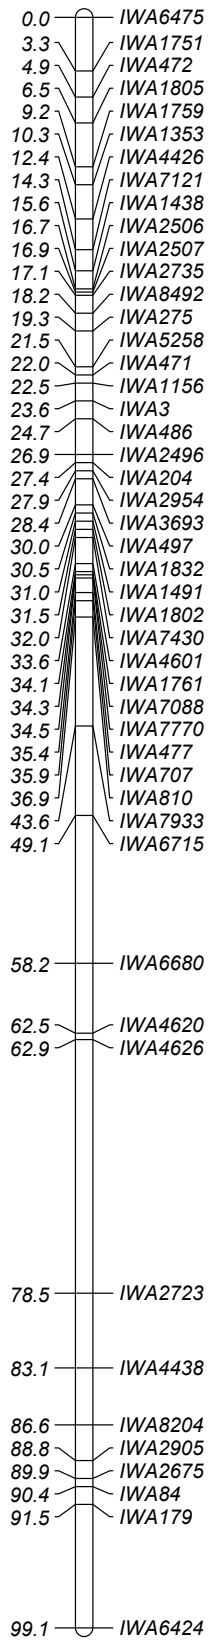

7A

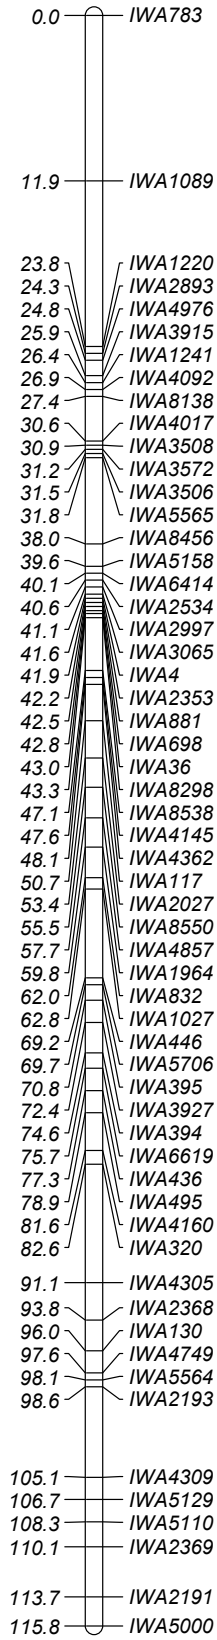

7B

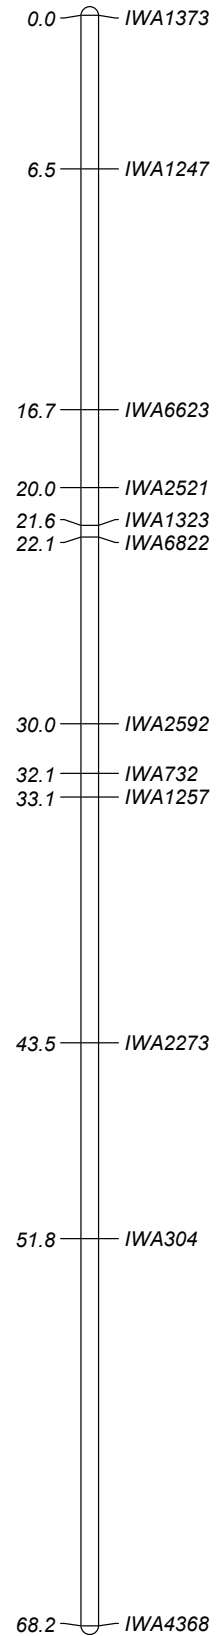

7D

Supplementary Figure S2



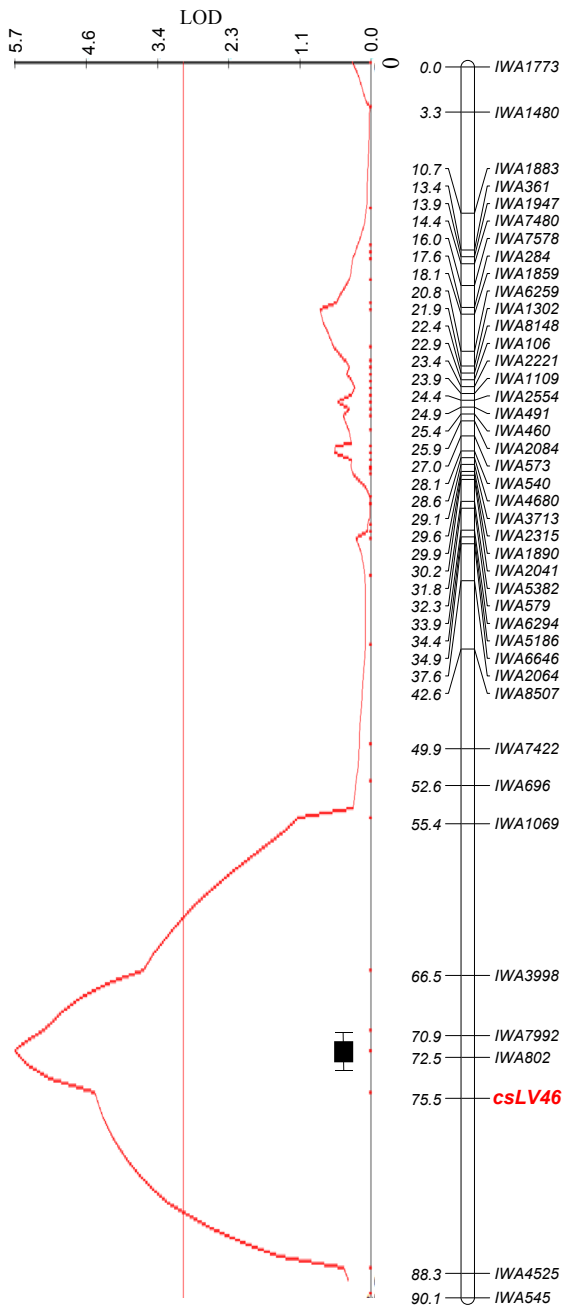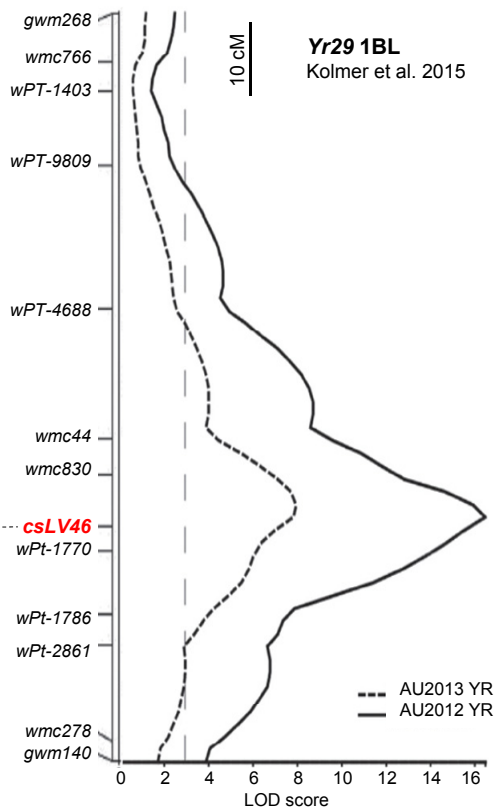

Supplementary Figure S3
